# Supplementary material for: Effects of elemental doping on the photoluminescence properties of graphene quantum dots
Source: Royal Society of Chemistry journal article supplement (doi:10.1039/c6ra19673j), 2016-01-01
Supplement: c6ra19673j1.pdf [file c6ra19673j1.pdf]

## Supplementary Information

### Effects of Elemental Doping on Photoluminescence Properties of Graphene

#### Quantum Dots

Kaiqi Wang<sup>a</sup>, Jian Dong<sup>a\*</sup>, Liping Sun<sup>a</sup>, Hongyu Chen<sup>a</sup>, Yi Wang<sup>a</sup>, Chongxin Wang<sup>a</sup>, and Lifeng Dong<sup>a, b,\*</sup>

<sup>a</sup>School of Chemistry and Pharmaceutical Engineering, Taishan Medical University, Taian, 271016, P. R. China

<sup>b</sup>Department of Physics, Hamline University, Saint Paul, Minnesota 55104, USA

Bragg filtering (Gatan Microscopy Suite GMS 3) was applied to remove noise and analyze inter-plane distances of GQDs and doped-GQDs<sup>1-3</sup>. Fig. S1 demonstrate HRTEM images, corresponding fast Fourier transform (FFT), and Bragg filtered images of GQDs (a), N-GQDs (b), S-GQDs (c), P-GQDs (d), and B-GQDs (e).

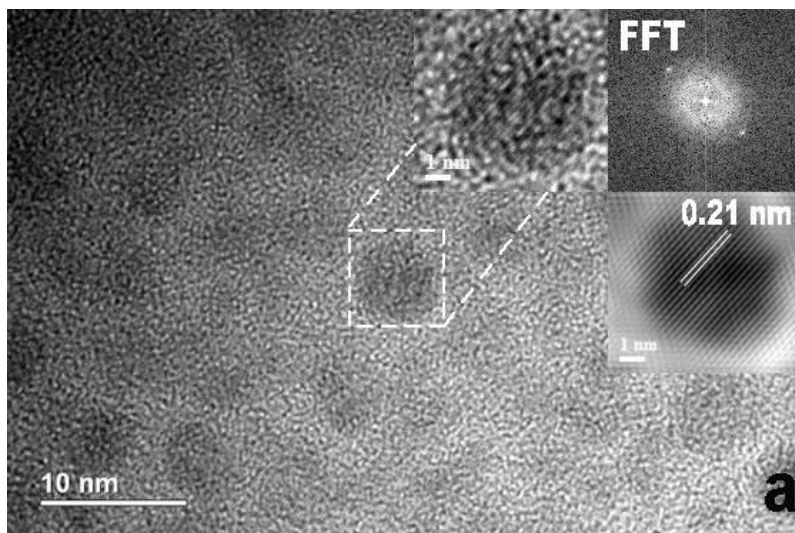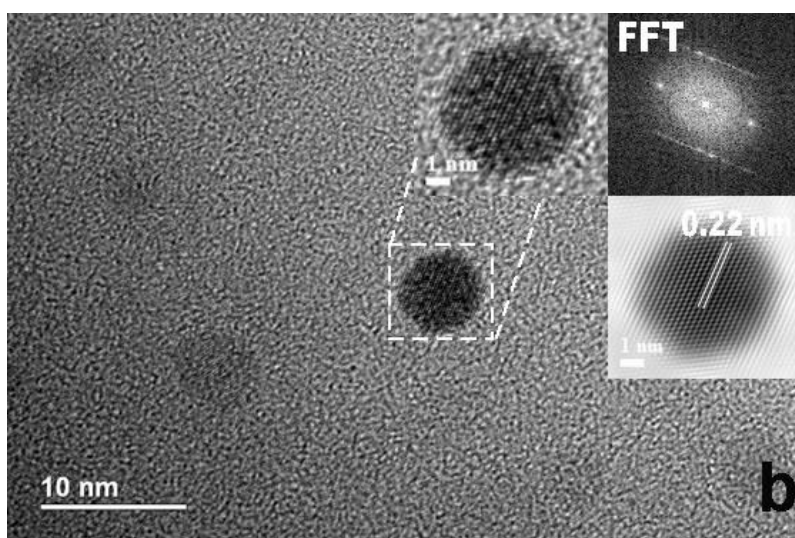

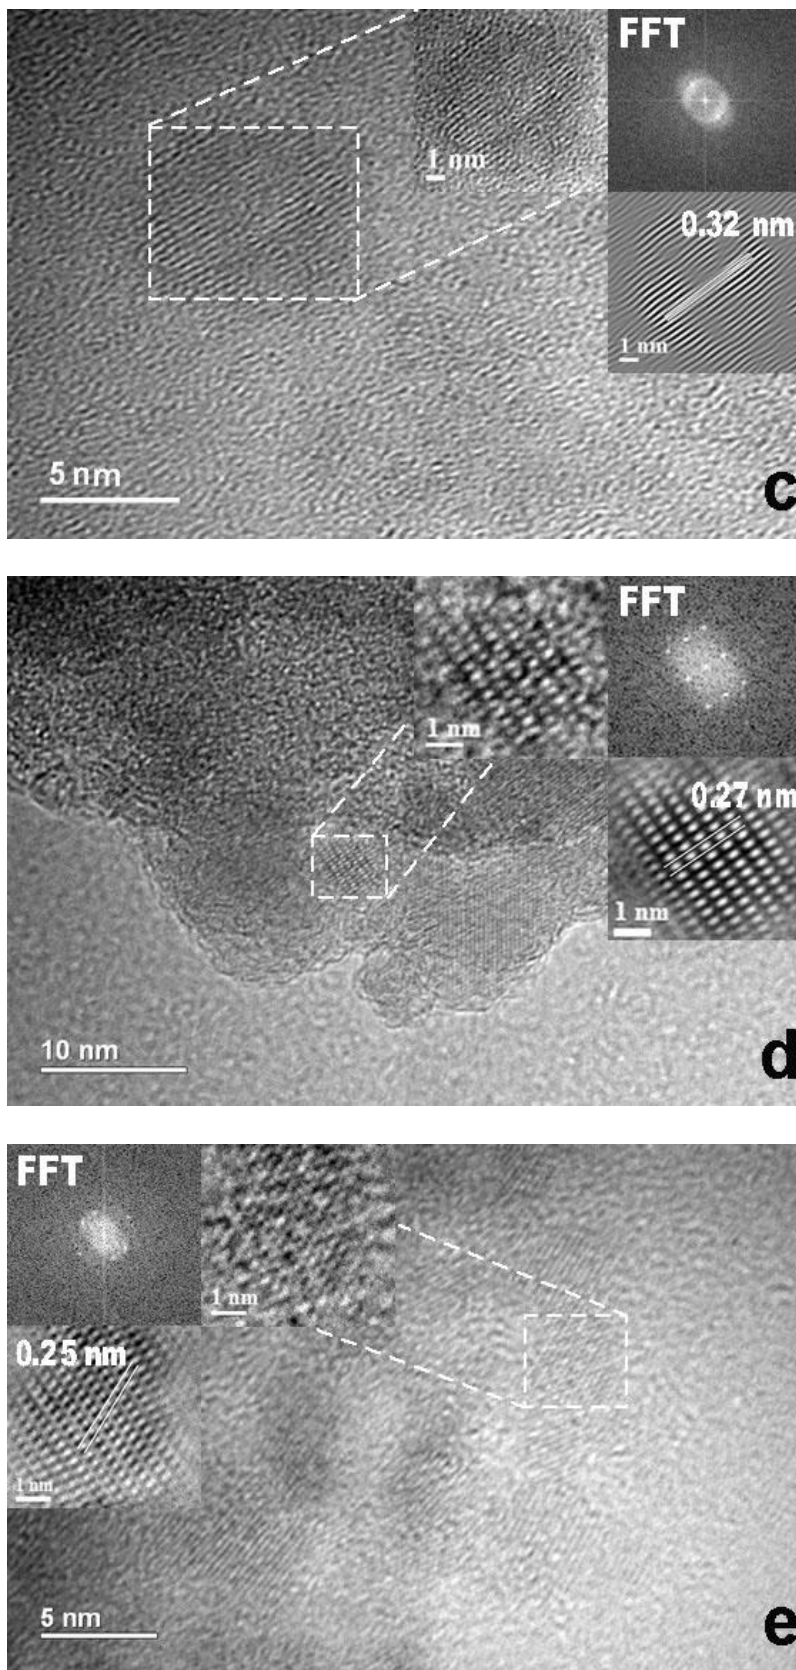

Fig. S1. TEM images of GQDs (a), N-GQDs (b), S-GQDs (c), P-GQDs (d) and B-GQDs (e), and their selected HRTEM images, fast Fourier transform (FFT), and Bragg filtered images.

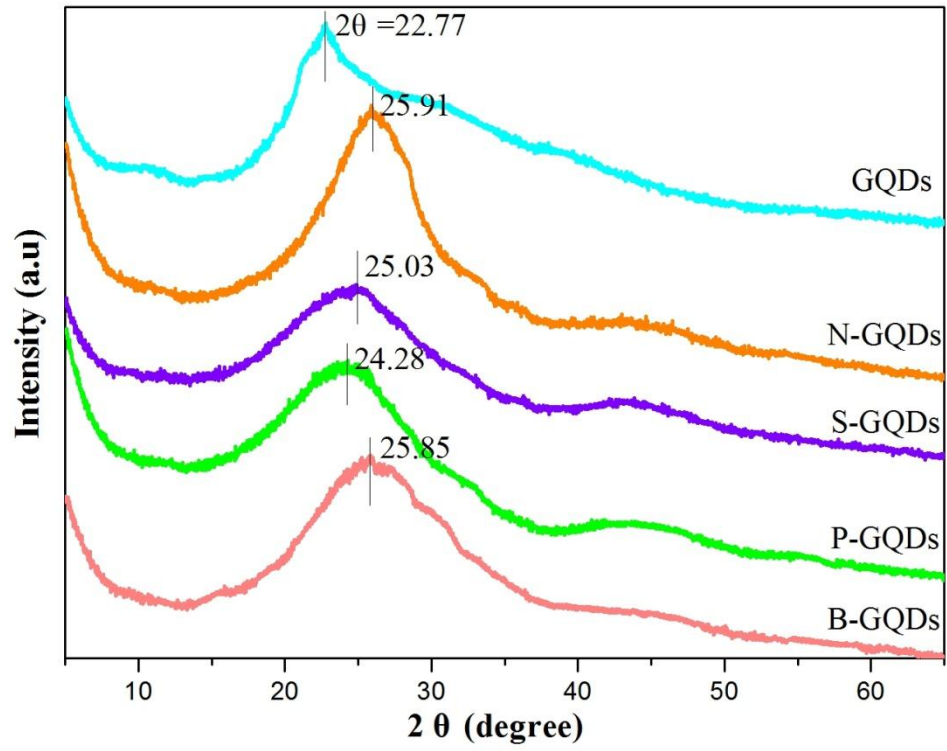

Fig. S2. XRD patterns of GQDs, N-GQDs, S-GQDs, P-GQDs and B-GQDs.

Table S1. The locations of D band, G band and  $I_D/I_G$  ratio of GQDs and doped GQDs.

| <b>Samples</b> | <b>D band</b> | <b>G band</b> | <b><math>I_D/I_G</math></b> |
|----------------|---------------|---------------|-----------------------------|
| <b>GQDs</b>    | 1330          | 1592          | 1.01                        |
| <b>N-GQDs</b>  | 1333          | 1572          | 0.88                        |
| <b>S-GQDs</b>  | 1343          | 1587          | 0.86                        |
| <b>P-GQDs</b>  | 1330          | 1593          | 0.98                        |
| <b>B-GQDs</b>  | 1330          | 1588          | 1.21                        |

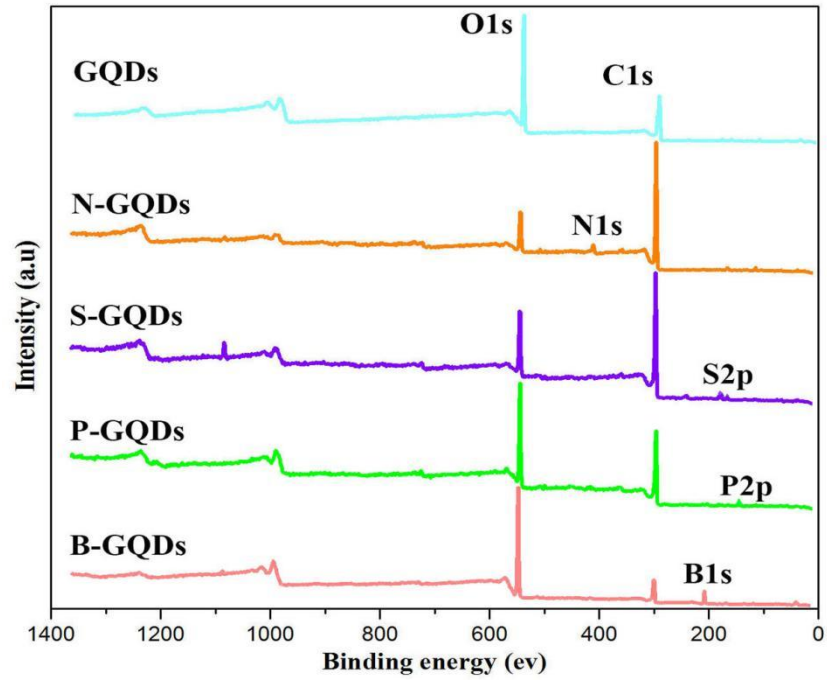

Fig. S3. Survey XPS spectra of GQDs, N-GQDs, S-GQDs, P-GQDs, and B-GQDs.

Table S2. The binding energies of the C1s spectra of GQDs and doped-GQDs.

| <b>Samples</b> | <b>C=C</b> | <b>C-O</b> | <b>C=O</b> | <b>O-C=O</b> | <b>C-N</b> | <b>C-S</b> | <b>C-P</b> | <b>C-B</b> |
|----------------|------------|------------|------------|--------------|------------|------------|------------|------------|
| <b>GQDs</b>    | 284.6      | 285.3      | 286.5      | 288.6        |            |            |            |            |
| <b>N-GQDs</b>  | 284.6      | 285.5      | 286.8      |              | 285.1      |            |            |            |
| <b>S-GQDs</b>  | 284.6      | 285.2      | 286.5      | 289.0        |            | 285.2      |            |            |
| <b>P-GQDs</b>  | 284.6      | 285.1      | 286.4      | 288.6        |            |            | 285.1      |            |
| <b>B-GQDs</b>  | 284.6      | 285.5      | 286.5      | 288.3        |            |            |            | 283.7      |

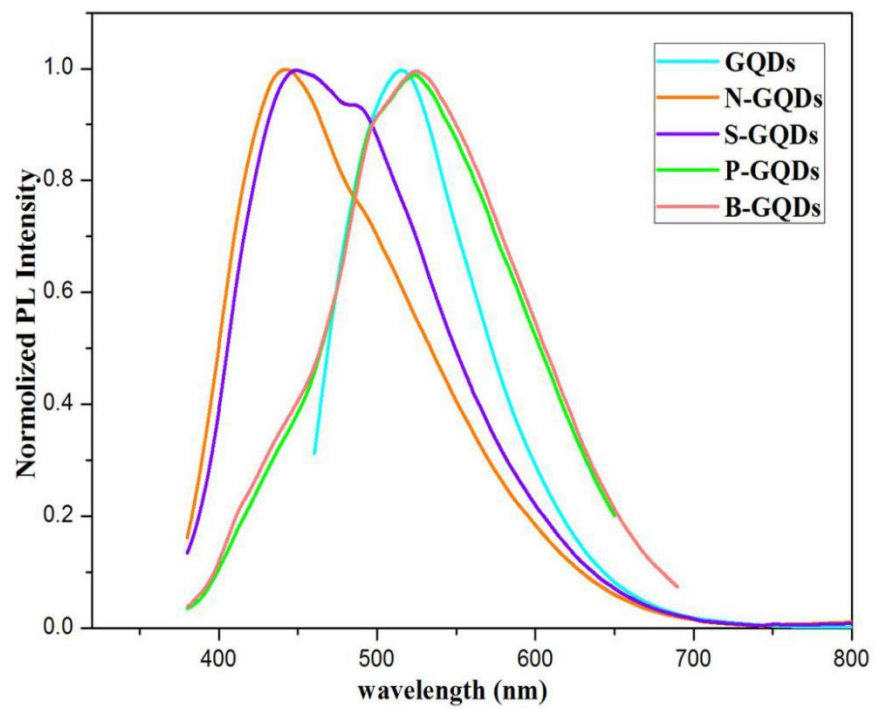

Fig. S4. Locations of PL prominent emission peaks of GQDs, N-GQDs, S-GQDs, P-GQDs and B-GQDs with an excitation wavelength of 360 nm.



Table S3. The wavelength of maximum emission of GQDs and doped-GQDs refluxing in HNO<sub>3</sub> for 8 h and 32 h.

| <b>Samples</b> | <b>Excitation Wavelength (nm)</b> |             | <b>Maximum Emission Wavelength (nm)</b> |             |
|----------------|-----------------------------------|-------------|-----------------------------------------|-------------|
|                | <b>8 h</b>                        | <b>32 h</b> | <b>8 h</b>                              | <b>32 h</b> |
| <b>N-GQDs</b>  | 360                               | 500         | 443.6                                   | 555.4       |
| <b>S-GQDs</b>  | 360                               | 460         | 447.8                                   | 525.4       |
| <b>P-GQDs</b>  | 360                               | 500         | 526.8                                   | 555.8       |
| <b>B-GQDs</b>  | 360                               | 500         | 525.2                                   | 557.4       |

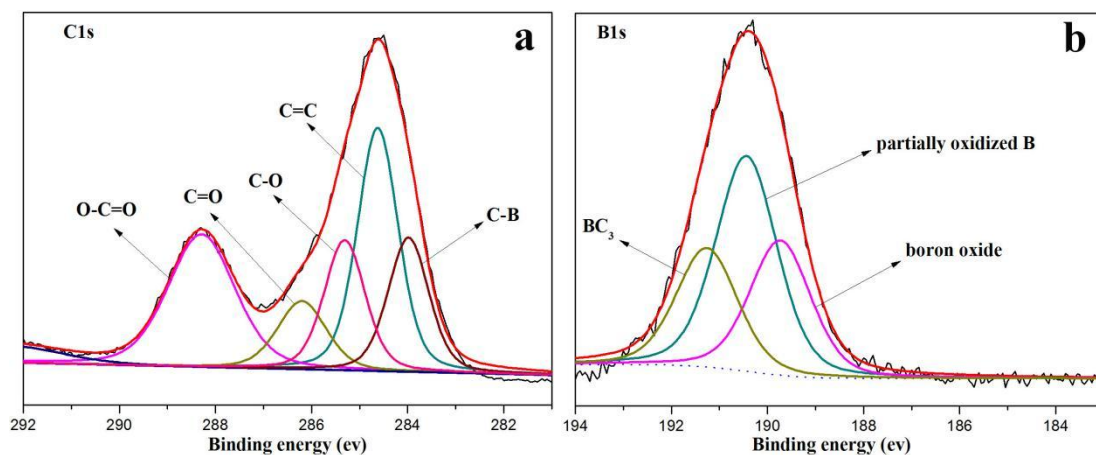

Fig. S5. C1s (a) and B1s (b) spectrum of B-GQDs refluxed in HNO<sub>3</sub> for 32 h.

#### References

1. S. Godefroo, M. Hayne, M. Jivanescu, A. Stesmans, M. Zacharias, O. I. Lebedev, G. Van Tendeloo and V. V. Moshchalkov, *Nature Nanotechnology*, 2008, **3**, 174-178.
2. M. A. Zurbuchen, G. Asayama, D. G. Schlom and S. K. Streiffer, *Physical Review Letters*, 2002, **88**, 107601.
3. M. J. Hytch, E. Snoeck and R. Kilaas, *Ultramicroscopy*, 1998, **74**, 131-146.
